# Supplementary material
Source: PubMed Central journal article supplement (PMC6659730)
Supplement: NIHMS1014793-supplement-1.pdf [file NIHMS1014793-supplement-1.pdf]

Supplementary Tables and Figures

**Supplementary Table 1: Gene probes significantly associated with total IgE in the GACRS and CAMP using differential gene expression.** . ■ Significant in both cohorts after adjustment for recent inhaled corticosteroid (ICS) use.

| Probe IDs | Gene Symbols | Chromosome | Adjusted P-Value |          | Significant after ICS adjustment |      |
|-----------|--------------|------------|------------------|----------|----------------------------------|------|
|           |              |            | GACRS            | CAMP     | GACRS                            | CAMP |
| 2470364   | PRSS33       | 16         | 2.79E-09         | 2.44E-10 | ■                                | ■    |
| 1780239   | OLIG2        | 21         | 1.65E-08         | 2.27E-12 | ■                                | ■    |
| 7570484   | TFF3         | 21         | 2.39E-08         | 6.74E-13 | ■                                | ■    |
| 2030142   | CLC          | 19         | 3.77E-08         | 4.03E-09 | ■                                | ■    |
| 5360048   | CCL23        | 17         | 1.49E-07         | 2.96E-10 | ■                                | ■    |
| 2030403   | OLIG1        | 21         | 1.49E-07         | 7.83E-07 | ■                                | ■    |
| 7320324   | EMR4P        | 19         | 1.49E-07         | 7.10E-06 | ■                                | ■    |
| 940519    | GPR44        | 11         | 1.97E-07         | 2.14E-08 | ■                                | ■    |
| 6450504   | FLJ43093     | 6          | 2.45E-07         | 2.02E-08 | ■                                | ■    |
| 2940767   | CEBPE        | 14         | 2.67E-07         | 2.62E-13 | ■                                | ■    |
| 1030278   | C10orf33     | 10         | 3.28E-07         | 3.85E-10 | ■                                | ■    |
| 5720470   | LOC653381    | 15         | 1.51E-06         | 4.92E-05 | ■                                | ■    |
| 780369    | SIGLEC8      | 19         | 1.55E-06         | 5.00E-09 | ■                                | ■    |
| 510463    | PIK3R6       | 17         | 2.92E-06         | 2.02E-08 | ■                                | ■    |
| 4180338   | LGALS12      | 11         | 6.06E-06         | 3.72E-04 | ■                                | ■    |
| 5720059   | GFOD1        | 6          | 8.71E-06         | 1.81E-03 | ■                                | ■    |
| 2190671   | CCR3         | 3          | 1.77E-05         | 9.16E-05 | ■                                | ■    |
| 1240446   | CAT          | 11         | 2.08E-05         | -        | ■                                |      |
| 6200253   | THBS4        | 5          | 2.27E-05         | -        | ■                                |      |
| 1850068   | C13orf27     | 13         | 2.32E-05         | -        | ■                                |      |
| 5870474   | RHOBTB3      | 5          | 2.72E-05         | 2.83E-03 | ■                                |      |
| 830519    | IL5RA        | 3          | 3.51E-05         | 2.01E-02 | ■                                | ■    |
| 4490324   | SMPD3        | 16         | 5.63E-05         | 2.24E-06 | ■                                | ■    |
| 7550022   | STXBP5       | 6          | 6.70E-05         | -        | ■                                |      |
| 6660315   | INPP1        | 2          | 1.53E-04         | 6.42E-05 | ■                                | ■    |
| 4480497   | SIGLEC10     | 19         | 1.57E-04         | -        | ■                                |      |
| 130187    | PAPSS1       | 4          | 1.79E-04         | -        | ■                                |      |
| 2510356   | EMR1         | 19         | 2.46E-04         | 5.50E-03 | ■                                | ■    |
| 2710400   | DSC2         | 18         | 2.49E-04         | -        | ■                                |      |
| 1050253   | ACOT11       | 1          | 2.56E-04         | 2.14E-04 | ■                                | ■    |
| 4610338   | CAMK1        | 3          | 3.04E-04         | 6.83E-05 | ■                                | ■    |
| 4290368   | PSTPIP2      | 18         | 3.22E-04         | 1.87E-03 | ■                                | ■    |
| 1300546   | VSTM1        | 19         | 4.64E-04         | 1.87E-06 | ■                                | ■    |
| 4200047   | RNF14        | 5          | 4.65E-04         | 3.10E-05 | ■                                | ■    |

|         |           |    |          |          |   |   |
|---------|-----------|----|----------|----------|---|---|
| 1740022 | SPNS3     | 17 | 6.16E-04 | 6.60E-09 | ■ | ■ |
| 4810181 | ZBTB42    | 14 | 7.51E-04 | 2.69E-08 | ■ | ■ |
| 520053  | OXER1     | 2  | 9.28E-04 | 2.64E-03 | ■ |   |
| 1430541 | LOC647308 | 14 | 9.38E-04 | -        | ■ |   |
| 2230678 | ACACB     | 12 | 1.01E-03 | -        | ■ |   |
| 5050093 | KBTBD11   | 8  | 1.01E-03 | -        | ■ |   |
| 5570711 | IDO1      | 8  | 1.07E-03 | 2.44E-10 | ■ | ■ |
| 60576   | LOC642639 | 9  | 1.18E-03 | 1.70E-03 | ■ | ■ |
| 1660703 | MGC72080  | 7  | 2.31E-03 | -        | ■ |   |
| 5390661 | VLDLR     | 9  | 2.31E-03 | -        | ■ |   |
| 1230286 | LTC4S     | 5  | 2.54E-03 | 6.86E-06 | ■ | ■ |
| 7610131 | EPAS1     | 2  | 3.24E-03 | 2.36E-02 | ■ |   |
| 1230487 | SRGAP3    | 3  | 3.32E-03 | -        | ■ | ■ |
| 2680202 | HYAL3     | 3  | 3.40E-03 | -        | ■ |   |
| 5820373 | ALDH6A1   | 14 | 4.07E-03 | -        | ■ |   |
| 6560239 | CYP4F12   | 19 | 4.23E-03 | 2.00E-05 | ■ | ■ |
| 7320441 | C7orf68   | 7  | 4.55E-03 | -        | ■ |   |
| 2640735 | BHLHB2    | 3  | 5.76E-03 | -        | ■ |   |
| 1300242 | ZNF440    | 19 | 6.61E-03 | -        | ■ |   |
| 4640398 | C6orf97   | 6  | 7.94E-03 | -        | ■ |   |
| 1240201 | BACE2     | 21 | 8.20E-03 | 2.31E-02 | ■ |   |
| 4050768 | CHST13    | 3  | 8.20E-03 | -        | ■ |   |
| 5290148 | GPT2      | 16 | 8.81E-03 | -        | ■ |   |
| 150309  | SLC24A3   | 20 | 1.17E-02 | -        | ■ |   |
| 6380040 | COL9A2    | 1  | 1.19E-02 | 1.35E-03 | ■ | ■ |
| 2640731 | HTR3A     | 11 | 1.19E-02 | -        | ■ |   |
| 290189  | FAM124B   | 2  | 1.32E-02 | 1.16E-02 | ■ | ■ |
| 2480068 | CD63      | 12 | 1.47E-02 | -        | ■ |   |
| 4150017 | PAQR7     | 1  | 1.53E-02 | -        | ■ |   |
| 6650196 | E2F5      | 8  | 1.54E-02 | -        | ■ |   |
| 4120224 | GPR18     | 13 | 1.54E-02 | -        | ■ |   |
| 2570661 | TRERF1    | 6  | 1.73E-02 | -        | ■ |   |
| 5260142 | C20orf79  | 20 | 1.79E-02 | -        | ■ |   |
| 3440689 | ACYP1     | 14 | 2.20E-02 | -        | ■ |   |
| 7560180 | SUSD1     | 9  | 2.24E-02 | -        | ■ |   |
| 2760500 | CD38      | 4  | 2.34E-02 | -        | ■ |   |
| 2350278 | PNOC      | 8  | 2.58E-02 | -        | ■ |   |
| 3420300 | EEF2K     | 16 | 2.66E-02 | 1.21E-04 | ■ | ■ |
| 5220612 | ECHDC3    | 10 | 2.76E-02 | -        | ■ |   |
| 1500608 | HSD3B7    | 16 | 3.15E-02 | 1.29E-02 | ■ |   |
| 4640768 | VPREB3    | 22 | 3.62E-02 | -        | ■ |   |
| 780725  | ADAM8     | 10 | 3.80E-02 | -        | ■ |   |
| 2070520 | CDCA7     | 2  | 3.80E-02 | -        | ■ |   |
| 7380670 | MYB       | 6  | 4.04E-02 | 3.10E-05 |   | ■ |

|         |           |    |          |          |   |
|---------|-----------|----|----------|----------|---|
| 3440674 | ASB2      | 14 | 4.24E-02 | -        |   |
| 7380273 | GPR114    | 16 | 4.39E-02 | 1.75E-02 | ■ |
| 6380102 | ATP8B3    | 19 | 4.70E-02 | -        |   |
| 3130543 | RNASE3    | 14 | -        | 4.15E-04 | ■ |
| 870138  | ADORA3    | 1  | -        | 8.04E-04 | ■ |
| 2640068 | RNASE2    | 14 | -        | 1.01E-03 | ■ |
| 1690446 | PNPLA6    | 19 | -        | 1.32E-03 | ■ |
| 5260070 | HES4      | 1  | -        | 1.39E-03 | ■ |
| 1400601 | C20orf100 | 20 | -        | 1.58E-03 | ■ |
| 2810253 | ACSF2     | 17 | -        | 1.70E-03 | ■ |
| 6280440 | BIK       | 22 | -        | 7.57E-03 | ■ |
| 1010736 | TOX2      | 20 | -        | 1.03E-02 | ■ |
| 1240025 | C17orf38  | 17 | -        | 1.29E-02 |   |
| 10253   | PPIL5     | 14 | -        | 1.60E-02 |   |
| 580475  | OLFM2     | 19 | -        | 1.70E-02 | ■ |
| 160437  | BRI3BP    | 12 | -        | 2.26E-02 |   |
| 430446  | KRT81     | 12 | -        | 2.36E-02 |   |
| 2360273 | SLC16A14  | 2  | -        | 2.49E-02 |   |
| 5360735 | FAM54B    | 1  | -        | 2.70E-02 |   |
| 4120750 | OBFC1     | 10 | -        | 3.09E-02 |   |
| 2260747 | HRK       | 12 | -        | 3.09E-02 |   |
| 6520215 | ANXA1     | 9  | -        | 3.09E-02 |   |
| 4070424 | C16orf93  | 16 | -        | 3.61E-02 | ■ |
| 3130196 | KCTD15    | 19 | -        | 4.84E-02 |   |
| 6020224 | FBP1      | 9  | -        | 4.87E-02 |   |

**Supplementary Table 2; Biological processes (raw p<0.01, fold enrichment>5, genes>1) enriched among the 42 replicated genes from the IgE-associated modules.** *Of the 42 genes that were in the GACRS IgE-associated module and in the CAMP IgE-associated module; 39 could be mapped in GO.*

| <b>GO biological process</b>                                    | <b># Genes in GO Group</b> | <b># Genes in this study</b> | <b># Expected Genes</b> | <b>Fold Enrichment</b> | <b>Raw P-value</b> |
|-----------------------------------------------------------------|----------------------------|------------------------------|-------------------------|------------------------|--------------------|
| positive regulation of gliogenesis (GO:0014015)                 | 51                         | 3                            | 0.09                    | 31.74                  | 0.0001             |
| regulation of T cell tolerance induction (GO:0002664)           | 12                         | 2                            | 0.02                    | 89.92                  | 0.0003             |
| regulation of tolerance induction (GO:0002643)                  | 18                         | 2                            | 0.03                    | 59.95                  | 0.0006             |
| regulation of gliogenesis (GO:0014013)                          | 101                        | 3                            | 0.19                    | 16.03                  | 0.0009             |
| positive regulation of neurogenesis (GO:0050769)                | 416                        | 5                            | 0.77                    | 6.48                   | 0.0010             |
| regulation of lymphocyte mediated immunity (GO:0002706)         | 126                        | 3                            | 0.23                    | 12.85                  | 0.0017             |
| leukotriene metabolic process (GO:0006691)                      | 32                         | 2                            | 0.06                    | 33.72                  | 0.0018             |
| positive regulation of nervous system development (GO:0051962)  | 477                        | 5                            | 0.88                    | 5.66                   | 0.0019             |
| regulation of lymphocyte activation (GO:0051249)                | 478                        | 5                            | 0.89                    | 5.64                   | 0.0019             |
| positive regulation of glial cell differentiation (GO:0045687)  | 33                         | 2                            | 0.06                    | 32.7                   | 0.0019             |
| positive regulation of cell development (GO:0010720)            | 483                        | 5                            | 0.9                     | 5.59                   | 0.0020             |
| monocarboxylic acid metabolic process (GO:0032787)              | 484                        | 5                            | 0.9                     | 5.57                   | 0.0020             |
| positive regulation of dendritic spine development (GO:0060999) | 40                         | 2                            | 0.07                    | 26.98                  | 0.0027             |
| lymphocyte chemotaxis (GO:0048247)                              | 43                         | 2                            | 0.08                    | 25.09                  | 0.0031             |
| regulation of T cell activation (GO:0050863)                    | 329                        | 4                            | 0.61                    | 6.56                   | 0.0033             |
| regulation of leukocyte mediated immunity (GO:0002703)          | 167                        | 3                            | 0.31                    | 9.69                   | 0.0038             |
| regulation of leukocyte cell-cell adhesion (GO:1903037)         | 344                        | 4                            | 0.64                    | 6.27                   | 0.0038             |
| regulation of immune effector process (GO:0002697)              | 363                        | 4                            | 0.67                    | 5.95                   | 0.0046             |
| lymphocyte migration (GO:0072676)                               | 56                         | 2                            | 0.1                     | 19.27                  | 0.0052             |
| regulation of glial cell differentiation (GO:0045685)           | 59                         | 2                            | 0.11                    | 18.29                  | 0.0057             |
| oligodendrocyte differentiation (GO:0048709)                    | 65                         | 2                            | 0.12                    | 16.6                   | 0.0068             |
| regulation of lymphocyte proliferation (GO:0050670)             | 210                        | 3                            | 0.39                    | 7.71                   | 0.0071             |
| regulation of mononuclear cell proliferation (GO:0032944)       | 211                        | 3                            | 0.39                    | 7.67                   | 0.0072             |
| regulation of dendritic spine development (GO:0060998)          | 67                         | 2                            | 0.12                    | 16.11                  | 0.0072             |
| positive regulation of dendrite development (GO:1900006)        | 69                         | 2                            | 0.13                    | 15.64                  | 0.0077             |

|                                                            |     |   |      |       |        |
|------------------------------------------------------------|-----|---|------|-------|--------|
| organic hydroxy compound metabolic process (GO:1901615)    | 421 | 4 | 0.78 | 5.13  | 0.0077 |
| neuron fate commitment (GO:0048663)                        | 70  | 2 | 0.13 | 15.42 | 0.0079 |
| regulation of cell-cell adhesion (GO:0022407)              | 425 | 4 | 0.79 | 5.08  | 0.0079 |
| regulation of leukocyte proliferation (GO:0070663)         | 219 | 3 | 0.41 | 7.39  | 0.0080 |
| positive regulation of T cell differentiation (GO:0045582) | 73  | 2 | 0.14 | 14.78 | 0.0085 |
| chemokine-mediated signaling pathway (GO:0070098)          | 74  | 2 | 0.14 | 14.58 | 0.0087 |
| cell fate commitment (GO:0045165)                          | 227 | 3 | 0.42 | 7.13  | 0.0088 |

**Supplementary Figure 1A: Cluster dendrogram detailing module assignment and the relationship between the resulting modules and serum total IgE in GACRS**

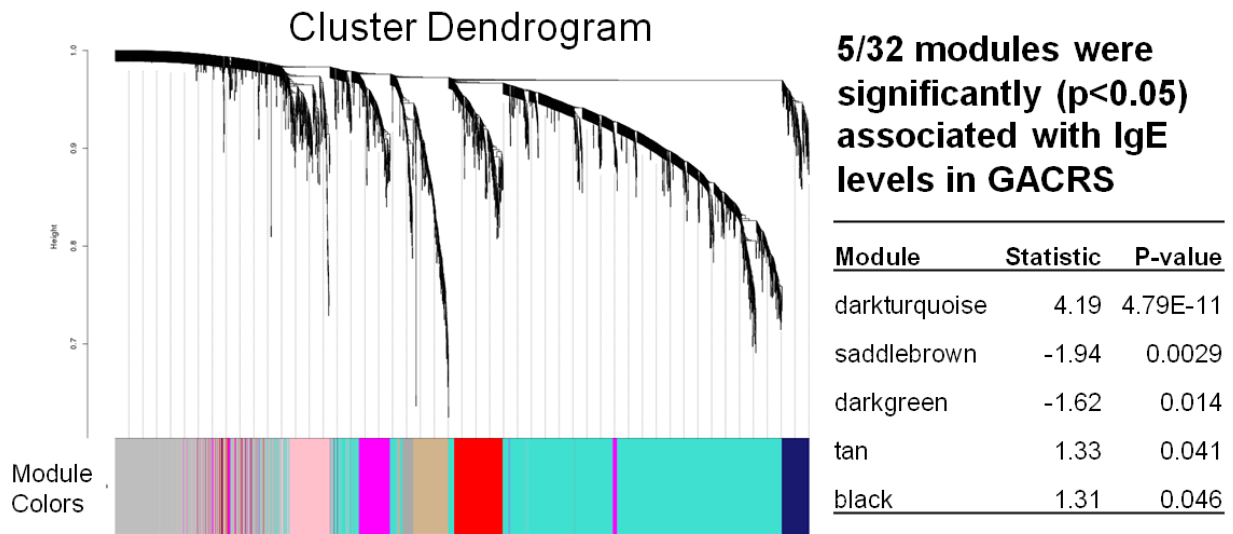

The dark turquoise module, referred to as the GACRS module, was selected as the module of interest given its high level of significance.

**Supplementary Figure 1B: Cluster dendrogram detailing module assignment and the relationship between the resulting modules and serum total IgE levels in CAMP**

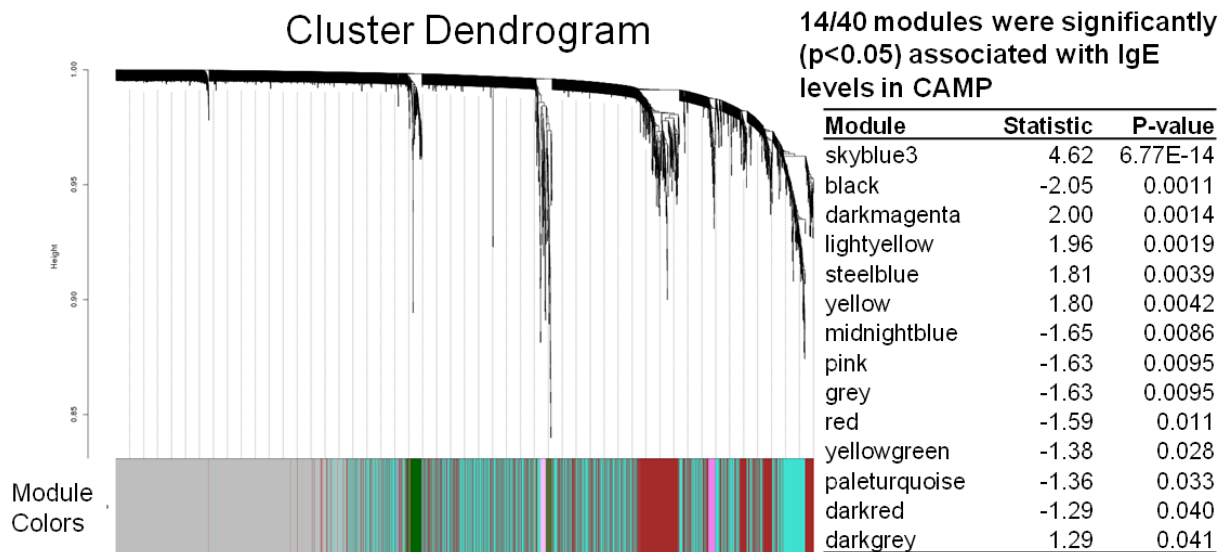

The sky blue 3 module, referred to as the CAMP module, was selected as the module of interest given its high level of significance.

**Supplementary Table 3: Biological processes enriched (raw  $p < 0.01$ , fold enrichment  $> 5$ , genes  $> 1$ ) among the 103 genes comprising the significant module in the GACRS Data. Of the 103 genes in the GACRS module; 100 could be mapped in GO**

| <b>GO biological process</b>                                                    | <b># Genes in GO Group</b> | <b># Genes in this study</b> | <b># Expected Genes</b> | <b>Fold Enrichment</b> | <b>Raw P-value</b> |
|---------------------------------------------------------------------------------|----------------------------|------------------------------|-------------------------|------------------------|--------------------|
| positive regulation of leukocyte activation (GO:0002696)                        | 369                        | 9                            | 1.75                    | 5.13                   | 7.71E-05           |
| positive regulation of cell activation (GO:0050867)                             | 379                        | 9                            | 1.8                     | 5                      | 9.41E-05           |
| positive regulation of gliogenesis (GO:0014015)                                 | 51                         | 4                            | 0.24                    | 16.5                   | 0.000134           |
| regulation of gliogenesis (GO:0014013)                                          | 101                        | 5                            | 0.48                    | 10.42                  | 0.000149           |
| regulation of glial cell differentiation (GO:0045685)                           | 59                         | 4                            | 0.28                    | 14.27                  | 0.000227           |
| oligodendrocyte differentiation (GO:0048709)                                    | 65                         | 4                            | 0.31                    | 12.95                  | 0.000322           |
| regulation of forebrain neuron differentiation (GO:2000977)                     | 4                          | 2                            | 0.02                    | 100.1                  | 0.000328           |
| neuron fate commitment (GO:0048663)                                             | 70                         | 4                            | 0.33                    | 12.02                  | 0.000421           |
| regulation of oligodendrocyte differentiation (GO:0048713)                      | 31                         | 3                            | 0.15                    | 20.36                  | 0.000552           |
| regulation of lymphocyte proliferation (GO:0050670)                             | 210                        | 6                            | 1                       | 6.01                   | 0.000569           |
| regulation of mononuclear cell proliferation (GO:0032944)                       | 211                        | 6                            | 1                       | 5.98                   | 0.000583           |
| positive regulation of glial cell differentiation (GO:0045687)                  | 33                         | 3                            | 0.16                    | 19.13                  | 0.000655           |
| regulation of leukocyte proliferation (GO:0070663)                              | 219                        | 6                            | 1.04                    | 5.76                   | 0.000705           |
| glial cell differentiation (GO:0010001)                                         | 148                        | 5                            | 0.7                     | 7.11                   | 0.000806           |
| regulation of leukocyte mediated immunity (GO:0002703)                          | 167                        | 5                            | 0.79                    | 6.3                    | 0.00136            |
| positive regulation of astrocyte differentiation (GO:0048711)                   | 10                         | 2                            | 0.05                    | 42.08                  | 0.00142            |
| positive regulation of peptidyl-tyrosine phosphorylation (GO:0050731)           | 172                        | 5                            | 0.82                    | 6.12                   | 0.00154            |
| ventral spinal cord development (GO:0021517)                                    | 46                         | 3                            | 0.22                    | 13.72                  | 0.00162            |
| regulation of T cell tolerance induction (GO:0002664)                           | 12                         | 2                            | 0.06                    | 35.07                  | 0.00194            |
| gliogenesis (GO:0042063)                                                        | 193                        | 5                            | 0.92                    | 5.45                   | 0.00251            |
| production of molecular mediator involved in inflammatory response (GO:0002532) | 15                         | 2                            | 0.07                    | 28.06                  | 0.00288            |
| regulation of lymphocyte mediated immunity (GO:0002706)                         | 126                        | 4                            | 0.6                     | 6.68                   | 0.00339            |
| granulocyte differentiation (GO:0030851)                                        | 17                         | 2                            | 0.08                    | 24.76                  | 0.00359            |
| negative regulation of hemopoiesis (GO:1903707)                                 | 128                        | 4                            | 0.61                    | 6.58                   | 0.00359            |
| amine metabolic process (GO:0009308)                                            | 64                         | 3                            | 0.3                     | 9.86                   | 0.00395            |

|                                                                                               |     |   |      |       |         |
|-----------------------------------------------------------------------------------------------|-----|---|------|-------|---------|
| regulation of tolerance induction (GO:0002643)                                                | 18  | 2 | 0.09 | 23.38 | 0.00398 |
| negative regulation of wound healing (GO:0061045)                                             | 65  | 3 | 0.31 | 9.71  | 0.00412 |
| somatic stem cell population maintenance (GO:0035019)                                         | 66  | 3 | 0.31 | 9.56  | 0.00429 |
| regulation of wound healing (GO:0061041)                                                      | 135 | 4 | 0.64 | 6.23  | 0.00431 |
| protein ubiquitination involved in ubiquitin-dependent protein catabolic process (GO:0042787) | 139 | 4 | 0.66 | 6.06  | 0.00476 |
| aromatic amino acid family catabolic process (GO:0009074)                                     | 20  | 2 | 0.1  | 21.04 | 0.00481 |
| positive regulation of dendrite development (GO:1900006)                                      | 69  | 3 | 0.33 | 9.15  | 0.00484 |
| cell maturation (GO:0048469)                                                                  | 144 | 4 | 0.68 | 5.84  | 0.00538 |
| positive regulation of myeloid leukocyte mediated immunity (GO:0002888)                       | 23  | 2 | 0.11 | 18.3  | 0.00619 |
| negative regulation of response to wounding (GO:1903035)                                      | 76  | 3 | 0.36 | 8.31  | 0.00626 |
| positive regulation of vasculature development (GO:1904018)                                   | 151 | 4 | 0.72 | 5.57  | 0.00632 |
| diencephalon development (GO:0021536)                                                         | 78  | 3 | 0.37 | 8.09  | 0.00671 |
| negative regulation of myeloid cell differentiation (GO:0045638)                              | 79  | 3 | 0.38 | 7.99  | 0.00694 |
| regulation of astrocyte differentiation (GO:0048710)                                          | 25  | 2 | 0.12 | 16.83 | 0.0072  |
| regulation of response to wounding (GO:1903034)                                               | 158 | 4 | 0.75 | 5.33  | 0.00737 |
| regulation of T cell proliferation (GO:0042129)                                               | 158 | 4 | 0.75 | 5.33  | 0.00737 |
| regulation of glial cell proliferation (GO:0060251)                                           | 27  | 2 | 0.13 | 15.59 | 0.00827 |
| regulation of transforming growth factor beta production (GO:0071634)                         | 27  | 2 | 0.13 | 15.59 | 0.00827 |
| positive regulation of lymphocyte differentiation (GO:0045621)                                | 85  | 3 | 0.4  | 7.43  | 0.00843 |
| regulation of blood coagulation (GO:0030193)                                                  | 86  | 3 | 0.41 | 7.34  | 0.00869 |
| regulation of hemostasis (GO:1900046)                                                         | 86  | 3 | 0.41 | 7.34  | 0.00869 |
| aromatic amino acid family metabolic process (GO:0009072)                                     | 28  | 2 | 0.13 | 15.03 | 0.00884 |
| positive regulation of acute inflammatory response (GO:0002675)                               | 28  | 2 | 0.13 | 15.03 | 0.00884 |
| regulation of hematopoietic progenitor cell differentiation (GO:1901532)                      | 87  | 3 | 0.41 | 7.26  | 0.00896 |
| positive regulation of neutrophil chemotaxis (GO:0090023)                                     | 29  | 2 | 0.14 | 14.51 | 0.00942 |
| B cell receptor signaling pathway (GO:0050853)                                                | 90  | 3 | 0.43 | 7.01  | 0.0098  |
| embryonic placenta development (GO:0001892)                                                   | 90  | 3 | 0.43 | 7.01  | 0.0098  |



**Supplementary Table 4: Biological processes enriched (raw  $p < 0.01$ , fold enrichment  $> 5$ , genes  $> 1$ ) among the 38 genes comprising the significant module in the CAMP Data. Of the 38 genes in the module that were replicated in CAMP; 36 could be mapped in GO**

| GO biological process                                              | # Genes in GO Group | # Genes in this study | # Expected Genes | Fold Enrichment | Raw P-value |
|--------------------------------------------------------------------|---------------------|-----------------------|------------------|-----------------|-------------|
| oligodendrocyte differentiation (GO:0048709)                       | 65                  | 3                     | 0.11             | 26.98           | 0.0002      |
| regulation of T cell tolerance induction (GO:0002664)              | 12                  | 2                     | 0.02             | 97.42           | 0.0003      |
| regulation of tolerance induction (GO:0002643)                     | 18                  | 2                     | 0.03             | 64.94           | 0.0005      |
| inflammatory response (GO:0006954)                                 | 465                 | 5                     | 0.8              | 6.28            | 0.0011      |
| regulation of lymphocyte mediated immunity (GO:0002706)            | 126                 | 3                     | 0.22             | 13.92           | 0.0014      |
| leukotriene metabolic process (GO:0006691)                         | 32                  | 2                     | 0.05             | 36.53           | 0.0015      |
| positive regulation of glial cell differentiation (GO:0045687)     | 33                  | 2                     | 0.06             | 35.42           | 0.0016      |
| glial cell differentiation (GO:0010001)                            | 148                 | 3                     | 0.25             | 11.85           | 0.0022      |
| regulation of receptor activity (GO:0010469)                       | 546                 | 5                     | 0.93             | 5.35            | 0.0023      |
| regulation of cell activation (GO:0050865)                         | 577                 | 5                     | 0.99             | 5.06            | 0.0029      |
| regulation of leukocyte mediated immunity (GO:0002703)             | 167                 | 3                     | 0.29             | 10.5            | 0.0030      |
| positive regulation of gliogenesis (GO:0014015)                    | 51                  | 2                     | 0.09             | 22.92           | 0.0037      |
| gliogenesis (GO:0042063)                                           | 193                 | 3                     | 0.33             | 9.09            | 0.0045      |
| regulation of glial cell differentiation (GO:0045685)              | 59                  | 2                     | 0.1              | 19.81           | 0.0049      |
| regulation of lymphocyte proliferation (GO:0050670)                | 210                 | 3                     | 0.36             | 8.35            | 0.0057      |
| regulation of mononuclear cell proliferation (GO:0032944)          | 211                 | 3                     | 0.36             | 8.31            | 0.0058      |
| regulation of cell-cell adhesion (GO:0022407)                      | 425                 | 4                     | 0.73             | 5.5             | 0.0060      |
| multicellular organismal response to stress (GO:0033555)           | 66                  | 2                     | 0.11             | 17.71           | 0.0060      |
| regulation of leukocyte proliferation (GO:0070663)                 | 219                 | 3                     | 0.37             | 8.01            | 0.0064      |
| neuron fate commitment (GO:0048663)                                | 70                  | 2                     | 0.12             | 16.7            | 0.0067      |
| positive regulation of endothelial cell proliferation (GO:0001938) | 73                  | 2                     | 0.12             | 16.01           | 0.0073      |
| regulation of heart contraction (GO:0008016)                       | 231                 | 3                     | 0.4              | 7.59            | 0.0074      |
| regulation of angiogenesis (GO:0045765)                            | 232                 | 3                     | 0.4              | 7.56            | 0.0074      |
| chemokine-mediated signaling pathway (GO:0070098)                  | 74                  | 2                     | 0.13             | 15.8            | 0.0075      |
| regulation of vasculature development (GO:1901342)                 | 256                 | 3                     | 0.44             | 6.85            | 0.0097      |

**Supplementary Table 5: Replicated genes between the significant GACRS and CAMP modules R from WGCNA**

| <b>Gene Symbol</b> | <b>Gene Name</b>                                                             |
|--------------------|------------------------------------------------------------------------------|
| <b>ABTB2</b>       | Ankyrin Repeat And BTB (POZ) Domain Containing 2                             |
| <b>ACOT11</b>      | acyl-CoA thioesterase 11                                                     |
| <b>ADORA3</b>      | Adenosine A3 Receptor                                                        |
| <b>ATP8B3</b>      | ATPase, Aminophospholipid Transporter, Class I, Type 8B, Member 3            |
| <b>PYROXD2</b>     | Pyridine Nucleotide-Disulphide Oxidoreductase Domain 2 (previously c10orf33) |
| <b>CACNG6</b>      | Calcium Channel, Voltage-Dependent, Gamma Subunit 6                          |
| <b>CAMK1</b>       | calcium/calmodulin-dependent protein kinase I                                |
| <b>CCL23</b>       | chemokine (C-C motif) ligand 23                                              |
| <b>CCR3</b>        | chemokine (C-C motif) receptor 3                                             |
| <b>CD9</b>         | CD9 Molecule                                                                 |
| <b>CEBPE</b>       | CCAAT/enhancer binding protein (C/EBP), epsilon                              |
| <b>CLC</b>         | Charcot-Leyden crystal protein                                               |
| <b>CYP4F12</b>     | cytochrome P450, family 4, subfamily F, polypeptide 12                       |
| <b>EMR1</b>        | Adhesion G Protein-Coupled Receptor E1 (alias ADGRE1)                        |
| <b>EMR4P</b>       | Adhesion G Protein-Coupled Receptor E4, Pseudogene                           |
| <b>FLJ43093</b>    | Unknown                                                                      |
| <b>GFOD1</b>       | Glucose-Fructose Oxidoreductase Domain Containing 1                          |
| <b>GPR44</b>       | G protein-coupled receptor 44                                                |
| <b>IDO1</b>        | indoleamine 2,3-dioxygenase 1                                                |
| <b>IL5RA</b>       | Interleukin 5 Receptor, Alpha                                                |
| <b>INPP1</b>       | inositol polyphosphate-1-phosphatase                                         |
| <b>LGALS12</b>     | Galectin 12                                                                  |
| <b>LOC642639</b>   | Unknown                                                                      |
| <b>LOC653381</b>   | Sorbitol Dehydrogenase (alias: SORD2)                                        |
| <b>LTC4S</b>       | leukotriene C4 synthase                                                      |
| <b>OLIG1</b>       | oligodendrocyte transcription factor 1                                       |
| <b>OLIG2</b>       | oligodendrocyte lineage transcription factor 2                               |
| <b>PIK3R6</b>      | phosphoinositide-3-kinase, regulatory subunit 6                              |
| <b>PRSS33</b>      | protease, serine, 33                                                         |
| <b>RNASE2</b>      | Ribonuclease A Family Member 2                                               |
| <b>RNF14</b>       | ring finger protein 14                                                       |
| <b>SIGLEC8</b>     | sialic acid binding Ig-like lectin 8                                         |
| <b>SMPD3</b>       | sphingomyelin phosphodiesterase 3, neutral membrane                          |
| <b>SPNS3</b>       | spinster homolog 3 (Drosophila)                                              |
| <b>TFF3</b>        | trefoil factor 3 (intestinal)                                                |
| <b>THBS4</b>       | Thrombospondin 4                                                             |
| <b>VSTM1</b>       | V-set and transmembrane domain containing 1                                  |
| <b>ZBTB42</b>      | zinc finger and BTB domain containing 42                                     |

**Supplementary Table 6: Gene sets overlapping the gene set of 31 Common genes**

| <b>Gene Set Description</b>                                                                  | <b># genes overlap</b> | <b>p-value</b>        | <b>FDR (q-value)</b>  | <b>Genes</b>                            |
|----------------------------------------------------------------------------------------------|------------------------|-----------------------|-----------------------|-----------------------------------------|
| Neutrophils versus Monocytes (GSE22886)                                                      | 5                      | $1.35 \times 10^{-7}$ | $6.55 \times 10^{-4}$ | <i>GPR44, CCR3, IL5RA, CLC, SIGLEC8</i> |
| Bone Marrow derived macrophages with MLL4 knockout: control versus LPS stimulated (GSE30971) | 4                      | $6.57 \times 10^{-6}$ | $1.07 \times 10^{-2}$ | <i>EMR1, CCL23, OLIG2, OLIG1</i>        |
| Eosinophils versus Th1 cells (GSE3982)                                                       | 4                      | $6.57 \times 10^{-6}$ | $1.07 \times 10^{-2}$ | <i>SMPD3, CCL23, IDO1, CEBPE</i>        |
